# Supplementary material
Source: PubMed Central journal article supplement (PMC5240740)
Supplement: supp_tpc.16.00609_TPC2016-00609-RAR1_Supplemental_Data.pdf [file supp_tpc.16.00609_TPC2016-00609-RAR1_Supplemental_Data.pdf]

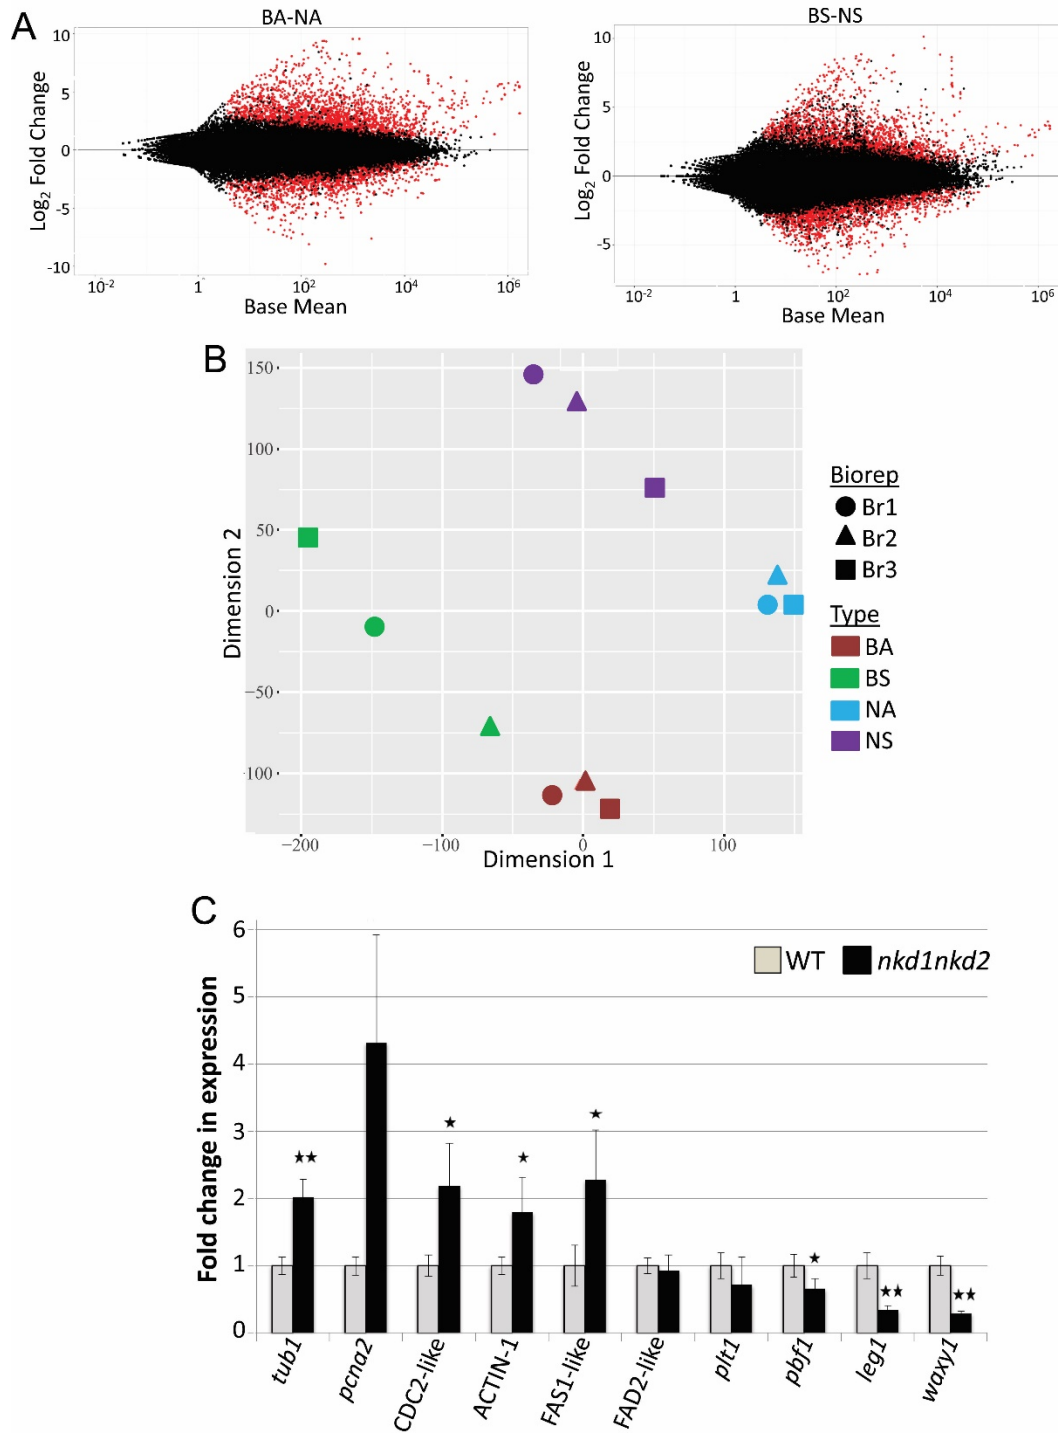

**Supplemental Figure 1.** Maize V3 LCM-RNAseq Transcriptome Assembly and DE Gene Confirmation

LCM-RNAseq data reported in Yi et al., 2015 (GSE61057 <http://www.ncbi.nlm.nih.gov/geo/query/acc.cgi?acc=GSE61057>) was realigned to the Maize V3 reference genome using Tophat2 version 2.1.0 and BEDTools package.

**(A)** MA plots of  $\log_2$  fold change in transcript abundance of *nkd1 nkd2* mutant relative to WT plotted against mean normalized read counts in mutant and WT aleurone (BA-NA) and starchy endosperm (BS-NS). Black dots represent genes detected with  $\geq 1$  read count and red dots represent DE genes (adjusted p-value  $\leq 0.01$ ).

**(B)** Two dimensional scatter plot generated by MDS (Multidimensional scaling) analysis of DE genes in the three biological replicates from WT and *nkd1 nkd2* mutant endosperm analysis.

**(C)** Bar diagram showing subset of tested genes using qRT-PCR from Figure 1. Error bars represent standard error of the mean of three biological replications. The statistically significant DE genes are indicated by asterisks. \*denotes  $P < 0.05$ , \*\* for  $P < 0.01$ .

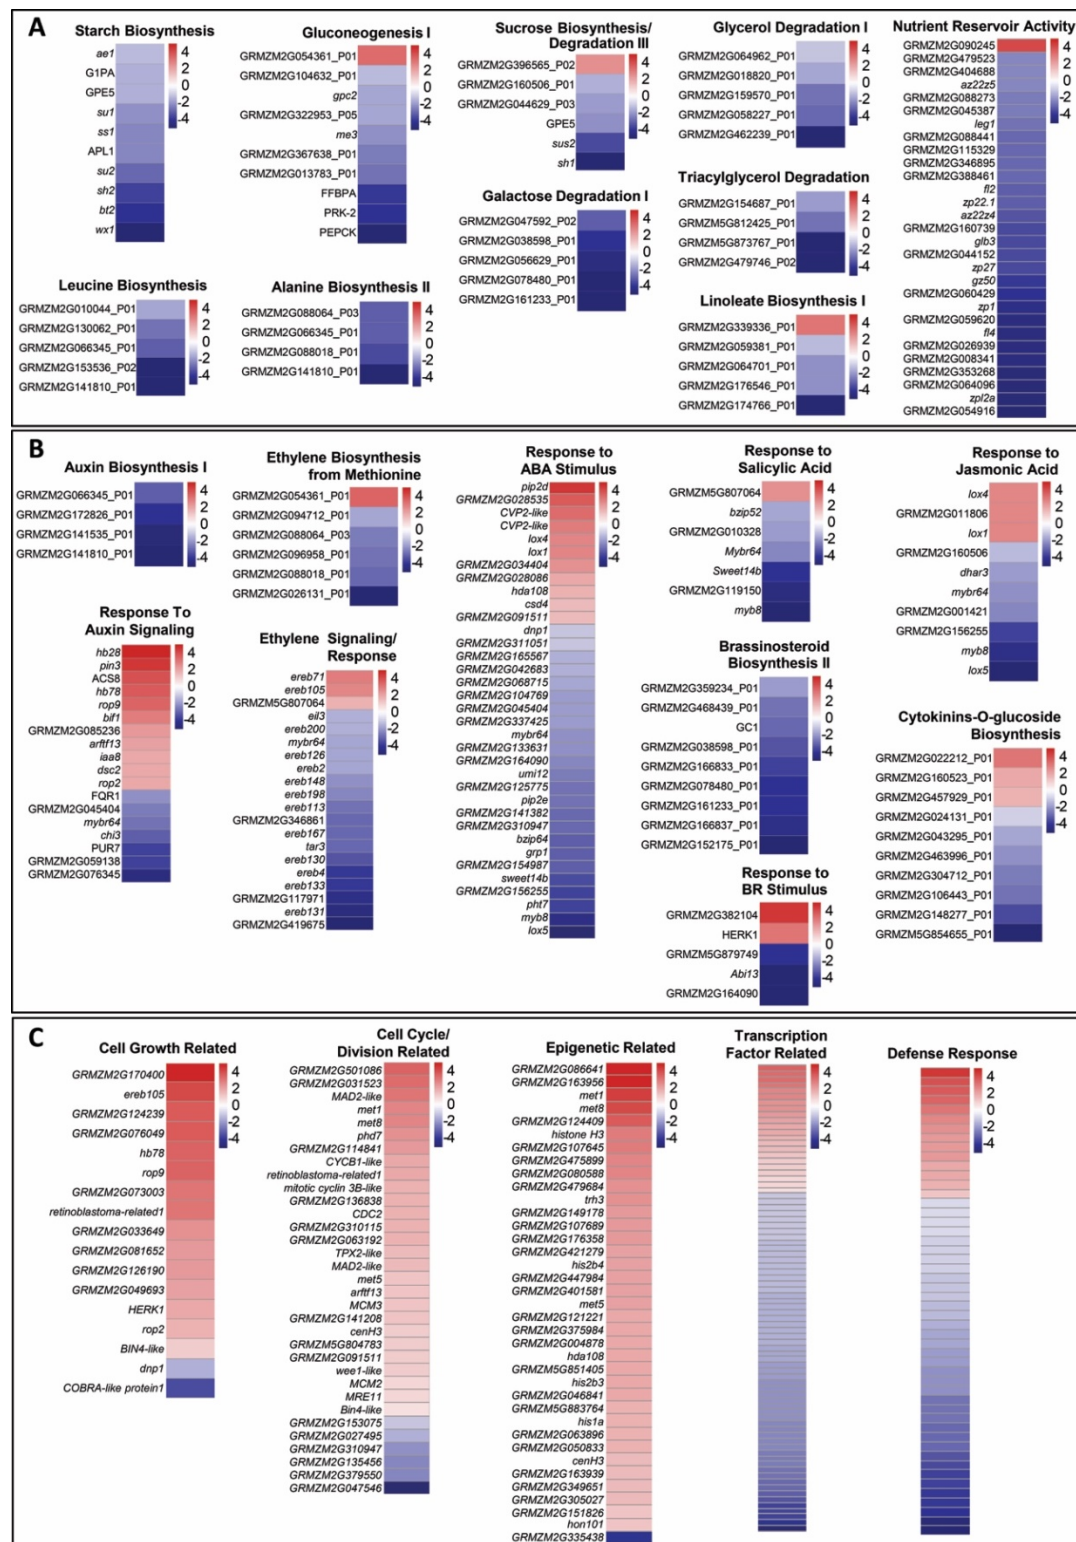

Supplemental Figure 2. Disrupted Pathways in *nkd1 nkd2* Mutant Aleurone

Log<sub>2</sub> fold change heat maps of DE genes functioning in (A) Resource reserve metabolism, (B) Hormone biosynthesis, signaling and response, and (C) Cell division/

growth regulation, defense response, epigenetic and transcriptional regulation of gene expression. See Supplemental Dataset 1 for further details.

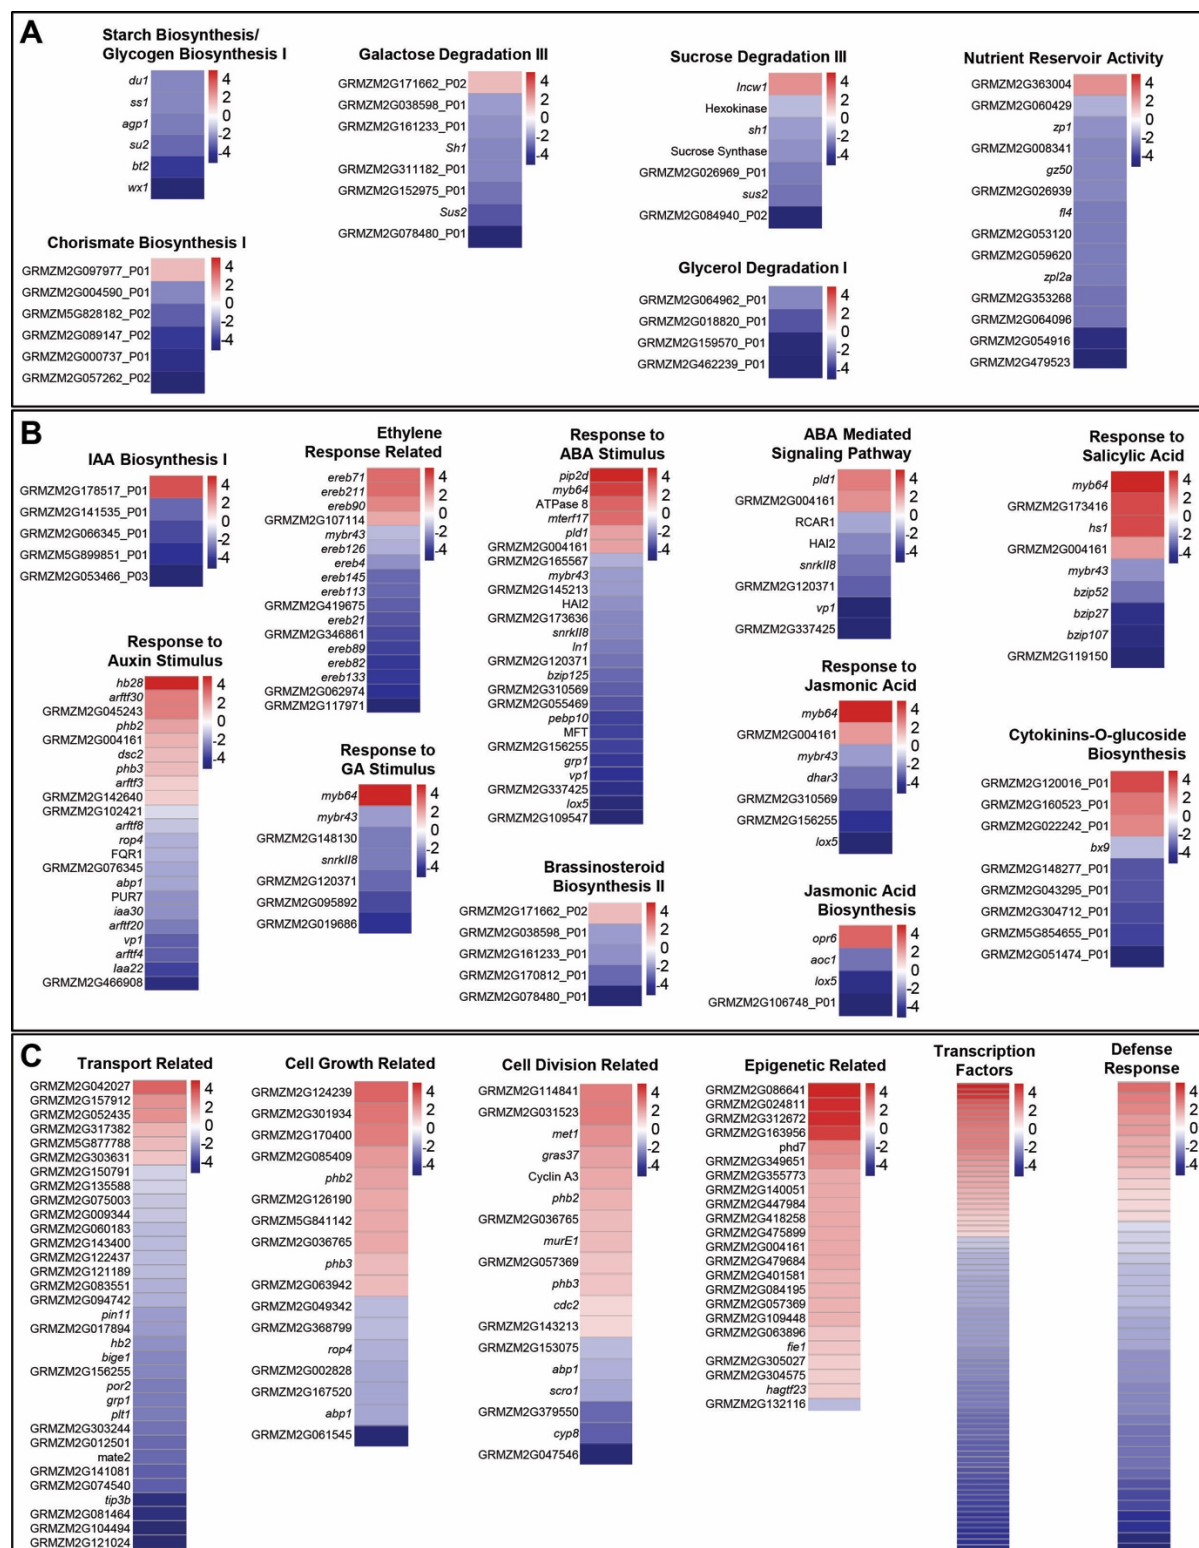

Supplemental Figure 3. Disrupted Pathways in *nkd1 nkd2* Mutant Starchy Endosperm

Log<sub>2</sub> fold change heat maps of DE genes functioning in **(A)** Resource reserve metabolism, **(B)** Hormone biosynthesis, signaling and response, and **(C)** Cell division/growth regulation, defense response, nutrient transport, epigenetic and transcriptional regulation of gene expression. See Supplemental Dataset 2 for further details.

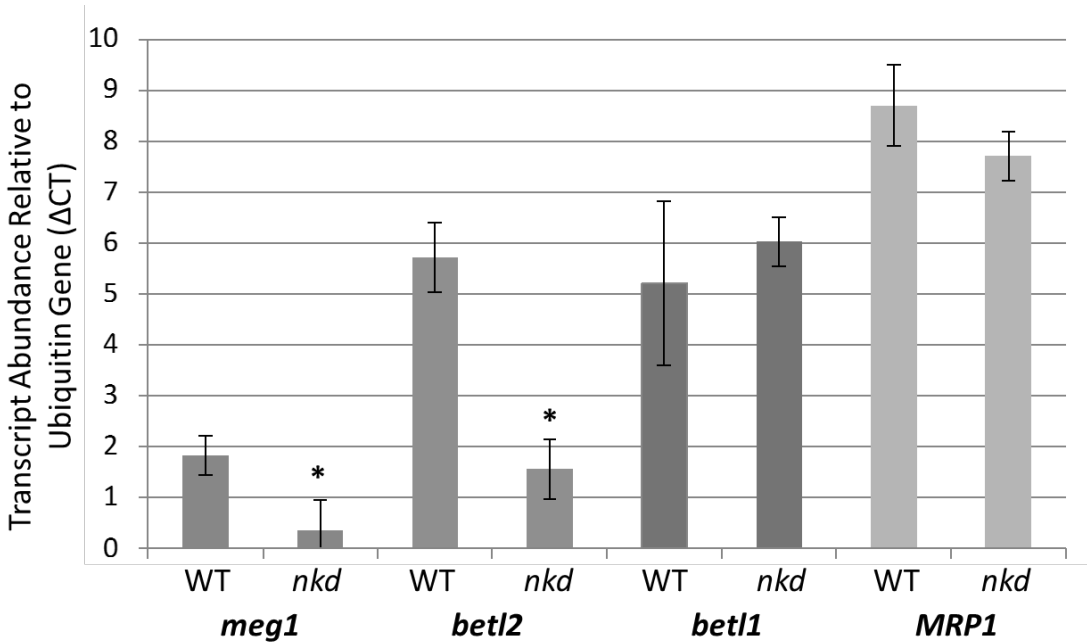

**Supplemental Figure 4. BETL qRT-PCR**

qRT-PCR on independent RNA samples from the lower quarter of segregating wildtype (WT) and *nkd1 nkd2* mutant (*nkd*) endosperms at 12DAP. Differential expression was determined by comparing WT to *nkd1 nkd2* mutant BETL marker gene expression using standard delta CT methodology relative to *ubiquitin* gene. \* denotes significant differential expression. Error bars represent the standard deviation from the mean of three biological replicates each with three technical replicates.

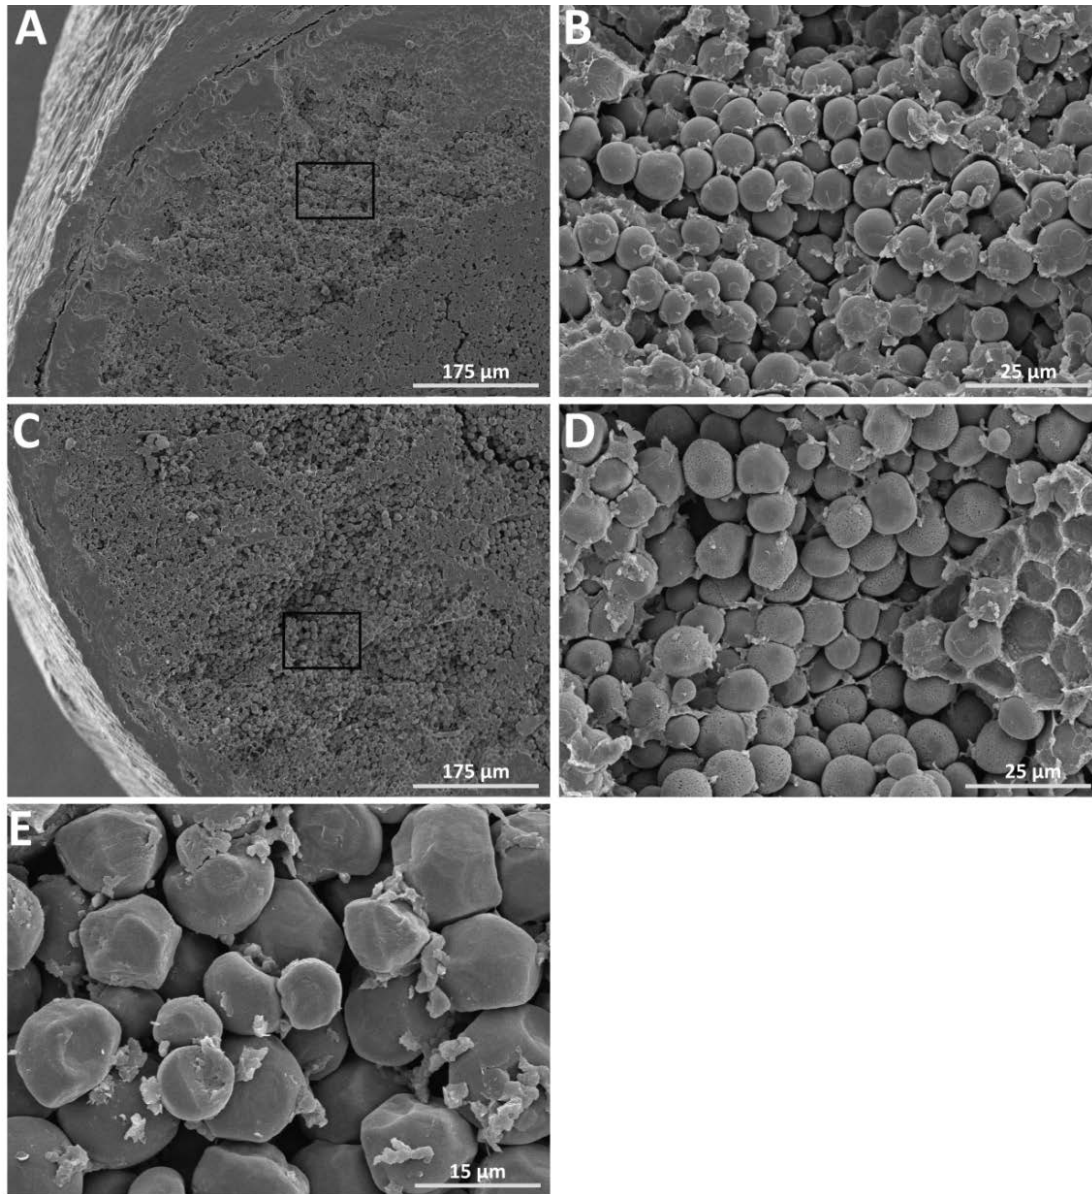

**Supplemental Figure 5.** *nkd1 nkd2* Mutant Starch Granule SEM

**(A and B)** Mature WT kernels from a segregating F2 ear described in Figure 3 C to F.  
**(C to E)** Mutant *nkd1-Ds;nkd2-Ds0297* starch granules.  
**(A and C)** Black boxes show position of images in panels **(B)** and **(D)**, respectively.  
**(E)** *nkd1 nkd2* mutant starch granules were sometimes faceted.



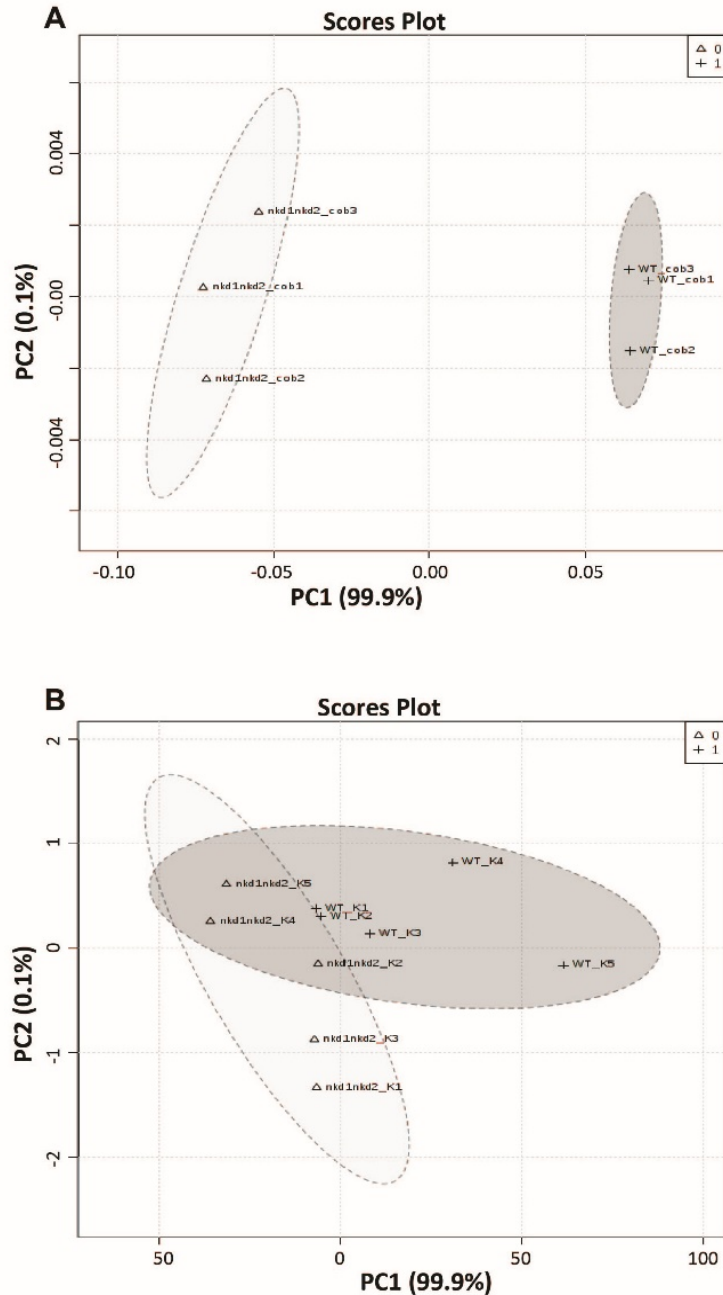

**Supplemental Figure 6.** Principal Component Analysis (PCA) of Wildtype and *nkd1-Ds nkd2-Ds0297* Mutant Resource Reserve Datasets

**(A)** PCA of WT and *nkd1 nkd2* mutant kernel weights and total protein datasets from independent segregating cobs (cob1-3).

**(B)** PCA of starch branch chain length and total starch content datasets from WT and *nkd1 nkd2* mutant kernels (k1-5).

**(A and B)** The first principal component is graphed on the x-axis and the second principal component is graphed on the y-axis. A third principal component was not generated for either analysis.

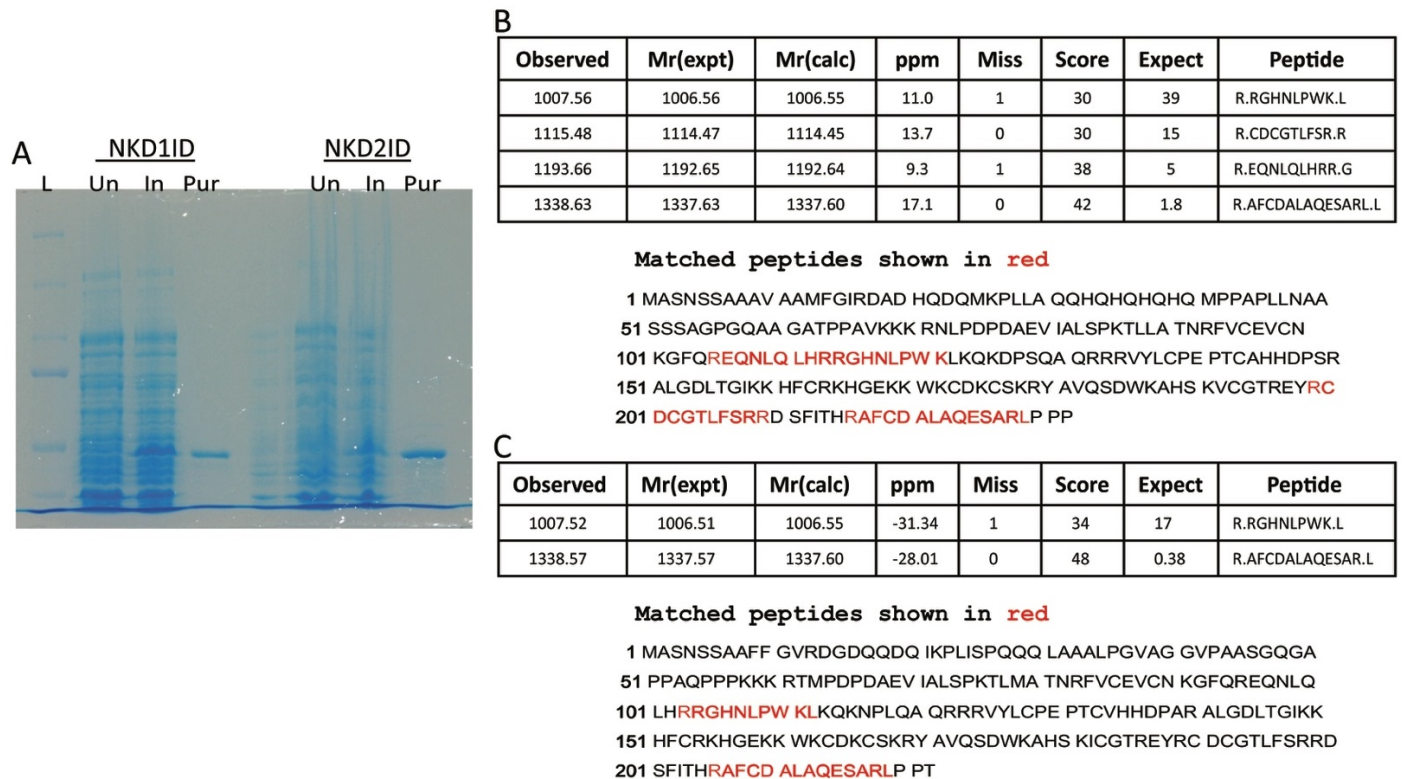

### Supplemental Figure 7. Verification of NKD-ID GST Fusion Proteins

**(A)** SDS-PAGE gel stained with Coomassie stain of IPTG un-induced, induced and purified NKD1ID and NKD2ID GST fusion proteins. Protein concentrations were determined via Bradford Protein Assay (Bio-Rad) and equivalent protein concentrations were loaded for each sample. “L” represents protein size ladder (Precision Plus Protein™ Dual Color Standards #1610374), “Un” represents total soluble un-induced protein, “In” represents IPTG induced total soluble protein, and “Pur” represents purified GST fusion proteins purified with Glutathione Sepharose 4B (GE Healthcare). Purified protein bands were cut out of the gel and were verified by trypsin digest QSTAR MS/MS. QSTAR MS/MS data and aligned fragments for NKD1-ID GST fusion protein **(B)** and NKD2-ID GST fusion protein **(C)** indicated by bold red lettering.

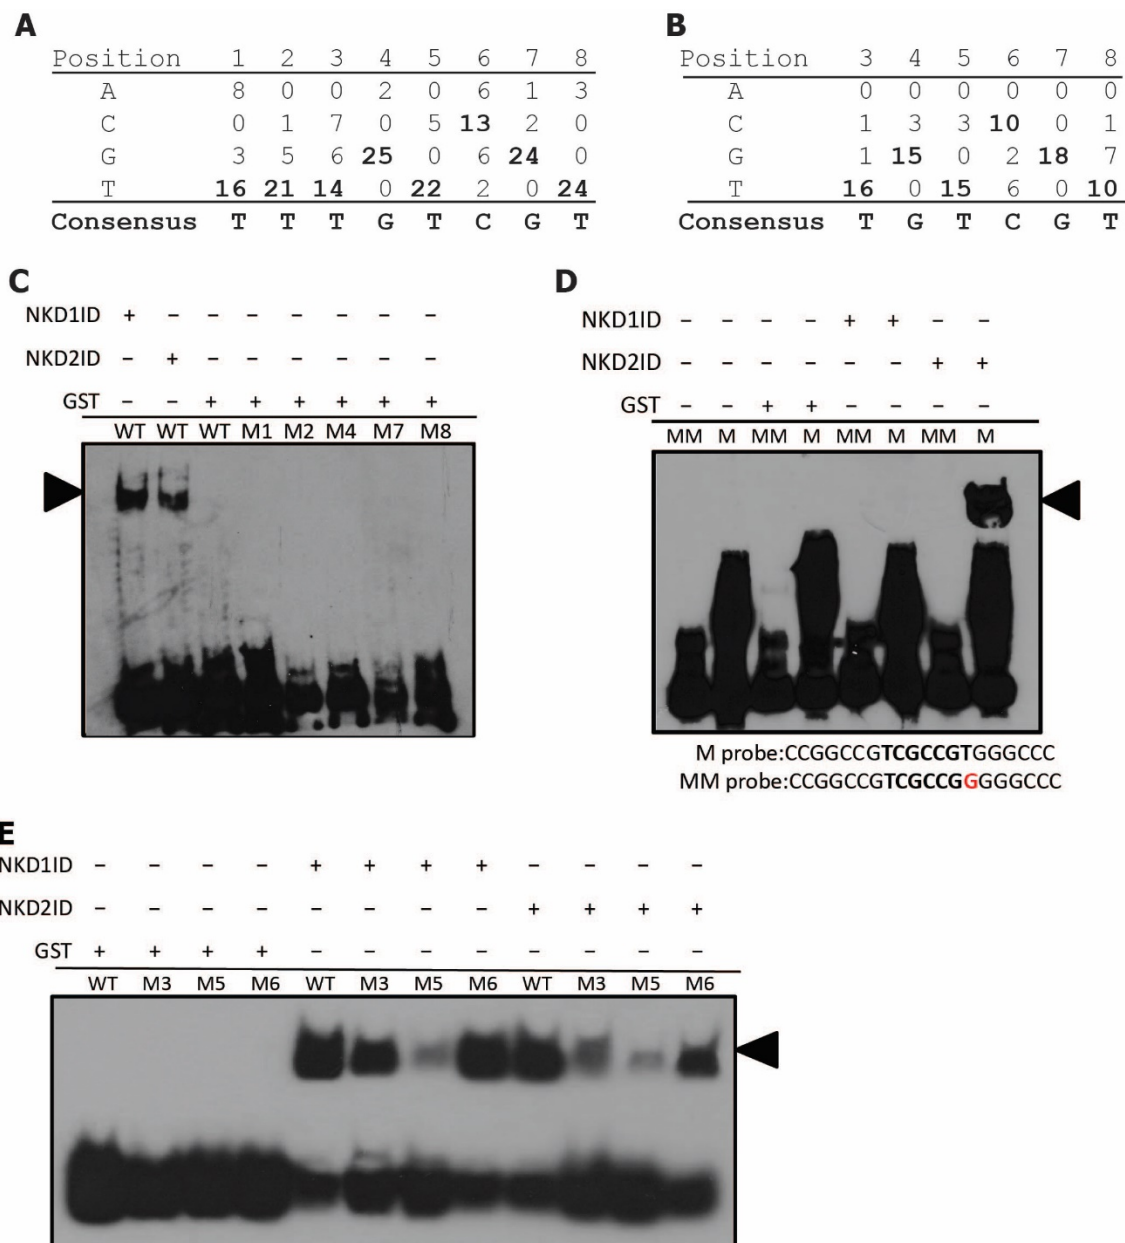

**Supplemental Figure 8.** EMSA Controls and Additional Tested Mutant Probes

**(A and B)** Positional base Frequency of MEME selected SAAB sequences for NKD1ID **(A)** and NKD2ID **(B)**.

**(C and D)** EMSA controls show the GST tag does not bind probes.

**(D and E)** Binding affinity of NKD1ID and NKD2ID GST fusion proteins for additional point mutated variants of the BCS probe. Sequences of probes used in **(D)** are shown, while for **(C and E)**, probes are as indicated in Figure 5C. The NKD/DNA complex is indicated by an arrowhead. + indicates protein used and '-' indicating protein not used for each lane.

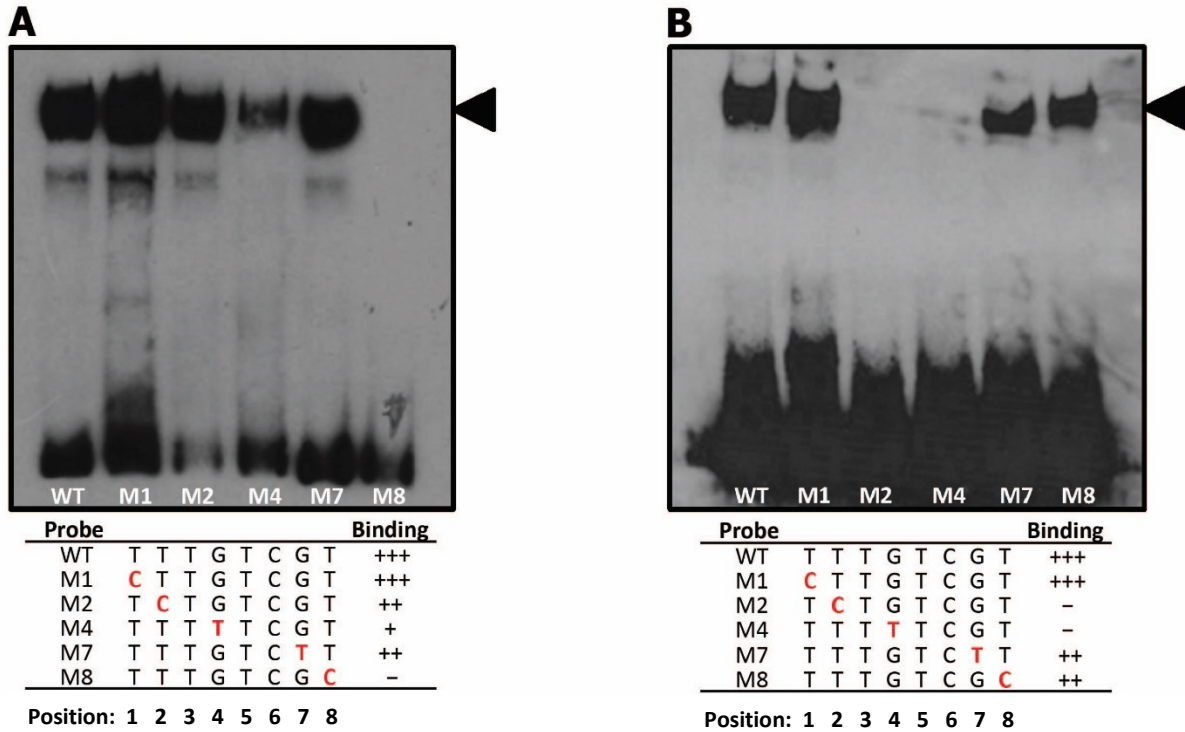

**Supplemental Figure 9.** Scanning Mutagenesis EMSA Overexposure

Over exposure of EMSAs described in Figure 5 for **(A)** NKD1ID and **(B)** NKD2ID GST fusion proteins. Note that no shift was detected for NKD1ID GST with point mutant probe variant M8 nor for NKD2ID GST with M2 and M4 point mutant probe variants.

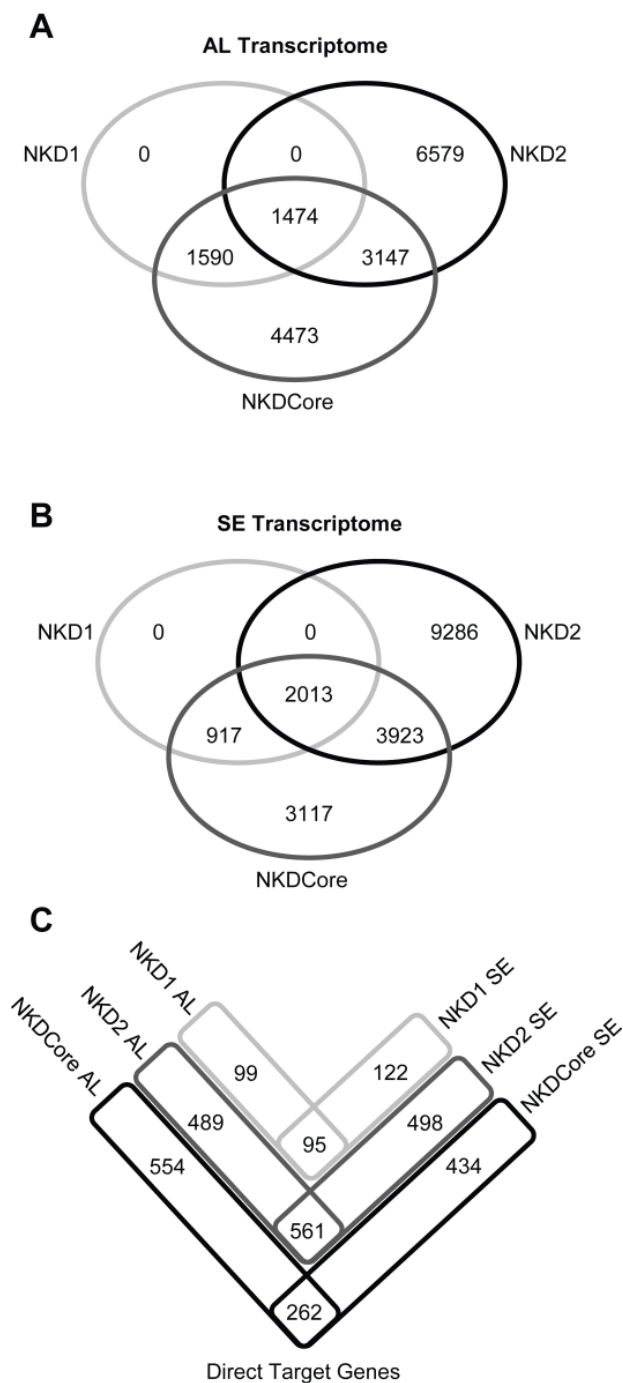

**Supplemental Figure 10.** Overlap in NKD Motifs and Predicted Direct Target Genes

**(A and B)** RNAseq detected genes with NKD1, NKD2, and/or NKDCore binding motif in proximal promoter region in **(A)** aleurone and **(B)** starchy endosperm.

**(C)** Shared and unique NKD1, NKD2 and NKDCore direct target genes in aleurone and starchy endosperm.

**A**

| Motif                                                                                              | DE AI Genes $\geq 1$ Motif in P.P. | AI Transcriptome $\geq 1$ Motif in P.P. | Enrichment                                    |
|----------------------------------------------------------------------------------------------------|------------------------------------|-----------------------------------------|-----------------------------------------------|
| NKD1 Control1<br> | 241                                | 3614                                    | (241/2135) vs (3614/32621)<br>p-value=0.778   |
| NKD1 Control2<br> | 168                                | 2903                                    | (168/2135) vs (2903/32621)<br>p-value=0.145   |
| NKD1 Control3<br> | 277                                | 3972                                    | (277/2135) vs (3972/32621)<br>p-value=0.345   |
| NKD2 Control1<br> | 1364                               | 20742                                   | (1364/2135) vs (20742/32621)<br>p-value=0.900 |
| NKD2 Control2<br> | 1102                               | 16538                                   | (1102/2135) vs (16538/32621)<br>p-value=0.645 |
| NKD2 Control3<br> | 1040                               | 16320                                   | (1040/2135) vs (16320/32621)<br>p-value=0.509 |

**B**

| Motif                                                                                                | DE S.E. Genes $\geq 1$ Motif in P.P. | S.E. Transcriptome $\geq 1$ Motif in P.P. | Enrichment                                    |
|------------------------------------------------------------------------------------------------------|--------------------------------------|-------------------------------------------|-----------------------------------------------|
| NKD1 Control1<br>   | 243                                  | 3473                                      | (243/2192) vs (3473/31389)<br>p-value=0.972   |
| NKD1 Control2<br>  | 192                                  | 2799                                      | (192/2192) vs (2799/31389)<br>p-value=0.847   |
| NKD1 Control3<br> | 260                                  | 3848                                      | (260/2192) vs (3848/31389)<br>p-value=0.663   |
| NKD2 Control1<br> | 1366                                 | 19932                                     | (1366/2192) vs (19932/31389)<br>p-value=0.606 |
| NKD2 Control2<br> | 1060                                 | 15889                                     | (1060/2192) vs (15889/31389)<br>p-value=0.242 |
| NKD2 Control3<br> | 1044                                 | 15647                                     | (1044/2192) vs (15647/31389)<br>p-value=0.247 |

**Supplemental Figure 11. NKD Motif Enrichment Shuffled Controls**

**(A)** Enrichment analysis for NKD1ID and NKD2ID shuffle control BCS occurrence in aleurone differentially expressed (DE) genes.

**(B)** BCS shuffle controls for starchy endosperm DE genes. Enrichment was determined relative to all genes detected in each RNAseq transcriptome.

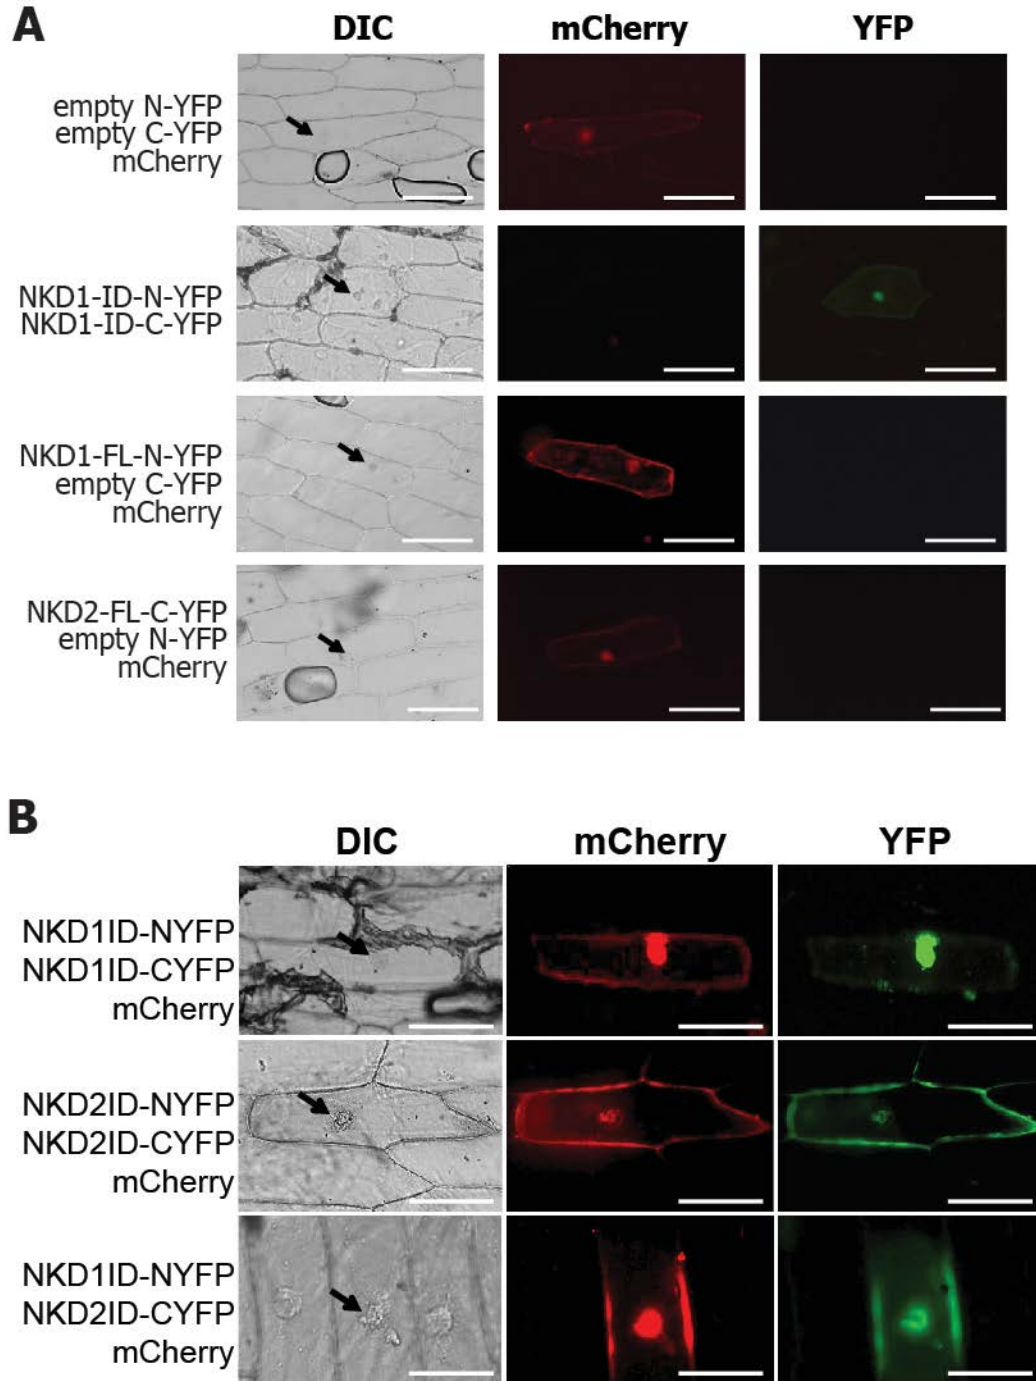

**Supplemental Figure 12.** BiFC Controls and NKD ID domain interactions.

**(A)** Control bombardments consisting of combinations of empty vector CYFP + empty vector NYFP, NKD1 and NKD2 NYFP + empty vector CYFP or NKD1 and NKD2 CYFP + empty vector NYFP did not produce YFP fluorescence. Bombardments of NKD1ID-CYFP + NKD1ID-NYFP without mCherry was visualized with the mCherry filter to verify

specificity of each fluorescent filter set for the respective fluorophore. Constructs used in each control assay are listed at the left of each row.

**(B)** BiFC NKD1ID and NKD2ID proteins. Vectors used for each BiFC assay are listed to the left of each row. Arrows designate nuclei viewed under differential interference contrast (DIC). mCherry fluorescence marks transient cells transformation and YFP fluorescence indicates a positive protein-protein interaction.

**(A and B)** size bars = 100 $\mu$ m.



## A

### Glutathione Column; Anti-6xHis Ab

Proteins

|              |   |     |     |     |     |   |      |   |      |   |      |
|--------------|---|-----|-----|-----|-----|---|------|---|------|---|------|
| NKD1ID-6xHis | + | Inp | -   | -   | -   | + | -    | - | -    |   |      |
| NKD2ID-6xHis | + | -   | inp | -   | -   | - | +    | + | +    |   |      |
| NKD1ID-GST   | - | -   | -   | inp | -   | + | -    | - | +    |   |      |
| NKD2ID-GST   | - | -   | -   | -   | inp | - | wash | + | wash | - | wash |

## B

### Nickel Column; Anti-GST Ab

Proteins

|            |   |     |     |     |     |   |      |   |      |   |      |
|------------|---|-----|-----|-----|-----|---|------|---|------|---|------|
| NKD1-6xHis | - | Inp | -   | -   | -   | + | -    | - | +    |   |      |
| NKD2-6xHis | - | -   | inp | -   | -   | - | +    | + | -    |   |      |
| NKD1-GST   | + | -   | -   | inp | -   | + | -    | - | -    |   |      |
| NKD2-GST   | + | -   | -   | -   | inp | - | +    | + | +    |   |      |
| 6xHis      | + | -   | -   | -   | -   | - | wash | - | wash | - | wash |

### Supplemental Figure 13. Reciprocal Tag Co-Pull Downs

**(A)** Reciprocal Co-pull downs described in Figure 6 for NKD1ID and NKD2ID 6xHis and GST tagged proteins.

**(B)** Reciprocal Co-pull downs with NKD1 and NKD2 full length fusion proteins.

**Supplemental Tables:**

| Sample              | No. Reads (x 10 <sup>6</sup> ) | % Uniquely mapped | % paired & mapped |
|---------------------|--------------------------------|-------------------|-------------------|
| WT AL               | 281                            | 87.44             | 72.26             |
| <i>nkd1 nkd2</i> AL | 310                            | 75.65             | 59.09             |
| WT SE               | 292                            | 56.87             | 40.71             |
| <i>nkd1 nkd2</i> SE | 256                            | 72.07             | 54.07             |

**Supplemental Table 1:** Summary of aleurone (AL) and starchy endosperm (SE) RNA sequencing reads from Yi et al., 2015 re-aligned and mapped to the maize reference genome (B73 RefGen-V3, GSE61057).

| Cell type | Expressed genes | Common genes | DE genes | Common DE genes | Higher in <i>nkd1 nkd2</i> | Lower in <i>nkd1 nkd2</i> |
|-----------|-----------------|--------------|----------|-----------------|----------------------------|---------------------------|
| AL        | 34014           | 31792        | 2188     | 935             | 799                        | 1389                      |
| SE        | 32629           | 31792        | 2193     | 935             | 915                        | 1278                      |

**Supplemental Table 2:** Summary of gene expression analysis in endosperm cell types

|           | <b>NKD1 SAAB Selected Sequences</b> |
|-----------|-------------------------------------|
| <b>1</b>  | TTGTCGT tttgtgtgaacc                |
| <b>2</b>  | accgtgtatt TTTGTCGT a               |
| <b>3</b>  | tattcgggtgt TTTGTCGT a              |
| <b>4</b>  | ccgt TTTGTGGT ttatgtgc              |
| <b>5</b>  | ttttaagt TGTGTCGT                   |
| <b>6</b>  | acact ATCGTCGT atcacca              |
| <b>7</b>  | tgcagttac TTGGTGGT                  |
| <b>8</b>  | cgc ATGGTCGT aacgtaagt              |
| <b>9</b>  | gatc ATTGTAGT acatactc              |
| <b>10</b> | tgcagcatg TTCGCCGT caa              |
| <b>11</b> | a TTGCCCGT atttgtcgaa               |
| <b>12</b> | attggccgta TTTGTCTGA ac             |
| <b>13</b> | ggtttacgca GTGGTCGT                 |
| <b>14</b> | c TTCGCAGT tacttgggtgg              |
| <b>15</b> | tgcatgaac ATTGCAGT aca              |
| <b>16</b> | ac GTCGTAGT gctgtatca               |
| <b>17</b> | gcgcgcga TTTGTACT cgca              |
| <b>18</b> | g ATTATCGT gatcatcctg               |
| <b>19</b> | attggc AGCGTGGT acgtga              |
| <b>20</b> | tacttat TTGGTGGG tcctt              |
| <b>21</b> | gtacc GTTGTGTTG gattgac             |
| <b>22</b> | ttagtccta TTCATGGT gc               |
| <b>23</b> | tgga TTGGCTGT attacatg              |
| <b>24</b> | gtacgaac AGTGTCTGA tgct             |
| <b>25</b> | ctggtctttc ACTGTAGT a               |
| <b>26</b> | tcta TGTGTGCT atcttcga              |
| <b>27</b> | TCCGTCAT caaacaggcg                 |

Supplemental Table 3: NKD1 SAAB Selected Sequences

|           | <b>NKD2 SAAB Selected Sequences</b> |
|-----------|-------------------------------------|
| <b>1</b>  | gaaccattttt <b>TGTCGT</b> ta        |
| <b>2</b>  | <b>TGTCGG</b> octaacgtaga           |
| <b>3</b>  | ccgctctctggcg <b>TGTCGG</b> c       |
| <b>4</b>  | gccgt <b>TGTCGG</b> tatcaacct       |
| <b>5</b>  | gtct <b>TGCCGT</b> ttggtgcgtg       |
| <b>6</b>  | cgttcaac <b>TGTTGT</b> ctcc         |
| <b>7</b>  | caagt <b>TGCCGT</b> ctatgtgcc       |
| <b>8</b>  | acagtggtagc <b>TGTTGT</b> ca        |
| <b>9</b>  | <b>TGTGGT</b> agtaaagtactga         |
| <b>10</b> | ttgta <b>TGTGGT</b> tacatata        |
| <b>11</b> | tctgcta <b>TGTGG</b> agttagt        |
| <b>12</b> | tatagat <b>TCTCGG</b> ctcggtg       |
| <b>13</b> | tatggttcagcc <b>TCTCGG</b> cc       |
| <b>14</b> | cagtactattt <b>TGTCGC</b> ta        |
| <b>15</b> | g <b>TGCTGT</b> tcaattgaataaa       |
| <b>16</b> | atg <b>CGTTGT</b> tgcggtgaact       |
| <b>17</b> | cac <b>GGTTGT</b> gtattagctgg       |
| <b>18</b> | agagtttctcaa <b>TCTCGG</b>          |

**Supplemental Table 4: NKD2 SAAB Selected Sequences**

| Gene ID       | Gene Annotation                                                    | <i>nkd1 nkd2</i> aleurone<br>log2FC | <i>o2</i> logFC | <i>o2</i> p-value |
|---------------|--------------------------------------------------------------------|-------------------------------------|-----------------|-------------------|
| GRMZM2G012806 | subtilisin-chymotrypsin inhibitor CI-1B                            | -6.41                               | -6.49           | 6.69E-301         |
| GRMZM2G353268 | 19 kD zein Z1A                                                     | -5.83                               | -2.03           | 1.71E-49          |
| GRMZM2G026939 | 19 kD zein Z1A                                                     | -5.67                               | -1.2            | 1.20E-02          |
| GRMZM2G059620 | 19 kD zein Z1A                                                     | -5.5                                | -1.58           | 2.36E-92          |
| GRMZM2G138689 | 50 kD $\gamma$ -zein                                               | -4.94                               | -1.15           | 3.30E-06          |
| GRMZM2G348914 | Unknown                                                            | -4.69                               | -2.02           | 1.18E-04          |
| GRMZM2G100018 | 18 kD $\delta$ -zein                                               | -4.43                               | -194.82         | 4.10E-24          |
| GRMZM2G138727 | 27 kD $\gamma$ -zein                                               | -4.38                               | -1.32           | 2.22E-10          |
| GRMZM2G044152 | 22 kD $\alpha$ -zein                                               | -4.32                               | -40.31          | 6.84E-70          |
| GRMZM2G160739 | 22 kD $\alpha$ -zein                                               | -4.22                               | -37.46          | 1.25E-231         |
| GRMZM2G086294 | 14 kD $\beta$ -zein                                                | -4.08                               | -6.06           | 0.00E+00          |
| GRMZM2G346897 | 22 kD $\alpha$ -zein                                               | -4.01                               | -14.41          | 1.02E-93          |
| GRMZM2G117956 | proline oxidase                                                    | -3.97                               | -3.93           | 3.71E-03          |
| GRMZM2G044625 | 22 kD $\alpha$ -zein                                               | -3.89                               | -12.21          | 0.00E+00          |
| GRMZM2G397687 | 22 kD $\alpha$ -zein                                               | -3.83                               | -24.63          | 0.00E+00          |
| GRMZM2G388461 | 22 kD $\alpha$ -zein                                               | -3.72                               | -79.37          | 6.60E-62          |
| GRMZM2G346895 | 22 kD $\alpha$ -zein                                               | -3.61                               | -75.76          | 2.30E-91          |
| GRMZM2G088441 | 22 kD $\alpha$ -zein                                               | -3.56                               | -154.55         | 1.70E-23          |
| GRMZM2G312877 | Lactoylglutathione lyase                                           | -3.5                                | -2.01           | 3.55E-05          |
| GRMZM2G045387 | 22 kD $\alpha$ -zein                                               | -3.22                               | -107.44         | 1.87E-194         |
| GRMZM2G088273 | 22 kD $\alpha$ -zein                                               | -3.07                               | -1.68E+06       | 7.60E-05          |
| GRMZM2G181362 | LKR/SDH                                                            | -2.91                               | -4.57           | 2.48E-17          |
| GRMZM2G088365 | 22 kD $\alpha$ -zein                                               | -2.88                               | -1.39E+07       | 9.78E-41          |
| GRMZM2G147424 | DNA-binding protein S1FA2                                          | -2.17                               | -1.65           | 6.84E-05          |
| GRMZM2G069651 | Heat shock protein Hsp90                                           | 2.75                                | 1.32            | 1.48E-02          |
| GRMZM2G458208 | Chaperonin Cpn60/TCP-1                                             | 3.85                                | 1.88            | 2.03E-03          |
| GRMZM2G156632 | Bowman-Birk type wound-induced proteinase inhibitor WIP1 Precursor | -6.46                               | 1.39            | 1.67E-02          |
| GRMZM2G304548 | Trypsin/factor XIII inhibitor Precursor                            | -4.91                               | 2.38            | 0.00E+00          |
| GRMZM2G005633 | Endochitinase B Precursor                                          | -4.67                               | 3.14            | 9.19E-42          |
| GRMZM2G410134 | plant lipid transfer protein/seed storage                          | -4.25                               | 1.34            | 1.61E-12          |
| GRMZM2G474575 | Proteinase inhibitor I3, Kunitz legume                             | -3.52                               | 2.37            | 3.51E-02          |
| GRMZM2G174883 | 11-S seed storage protein                                          | -3.48                               | 2.12            | 2.77E-58          |
| GRMZM2G030717 | cysteine proteinase inhibitor B                                    | -3.46                               | 5.14            | 1.45E-13          |
| GRMZM2G058358 | subtilisin-chymotrypsin inhibitor CI-1C                            | -3.27                               | 2.18            | 7.36E-11          |
| GRMZM2G146283 | Dof zinc finger protein PBF                                        | -3.22                               | 2.38            | 4.87E-08          |
| GRMZM2G001500 | Heat shock protein 70                                              | -2.16                               | 1.58            | 1.07E-02          |
| GRMZM2G130062 | 2-isopropylmalate synthase B                                       | -2.09                               | 1.21            | 4.03E-02          |
| GRMZM2G076239 | hydroxyacid oxidase 1                                              | -2.07                               | 1.57            | 5.49E-03          |
| GRMZM2G091481 | Protein disulfide-isomerase (PDI)                                  | -1.82                               | 1.3             | 9.41E-05          |
| GRMZM2G019325 | 40S ribosomal protein S11                                          | -1.82                               | 1.58            | 3.13E-04          |
| GRMZM2G448151 | 30S ribosomal protein S3, chloroplastic                            | 3.05                                | -1.22           | 4.69E-02          |
| GRMZM5G811749 | 30S ribosomal protein S16, chloroplastic                           | 3.2                                 | -1.29           | 5.34E-05          |

Supplemental Table 5: NKD1, NKD2 and O2 Aleurone Co-Regulated Genes

| Gene ID       | Gene Annotation                                                    | <i>nkd1 nkd2</i> starchy endosperm log <sub>2</sub> FC | <i>o2</i> logFC | <i>o2</i> p-value |
|---------------|--------------------------------------------------------------------|--------------------------------------------------------|-----------------|-------------------|
| GRMZM2G012806 | subtilisin-chymotrypsin inhibitor CI-1B                            | -4.69                                                  | -6.49           | 6.69E-301         |
| GRMZM2G353268 | 19 kD zein Z1A                                                     | -3.96                                                  | -2.03           | 1.71E-49          |
| GRMZM2G059620 | 19 kD zein Z1A                                                     | -3.71                                                  | -1.58           | 2.36E-92          |
| GRMZM2G026939 | 19 kD zein Z1A                                                     | -3.39                                                  | -1.2            | 1.20E-02          |
| GRMZM2G138689 | 50 kD $\gamma$ -zein                                               | -3.37                                                  | -1.15           | 3.30E-06          |
| GRMZM2G348914 | Unknown                                                            | -2.35                                                  | -2.02           | 1.18E-04          |
| GRMZM2G100018 | 18 kD $\delta$ -zein                                               | -2.26                                                  | -194.82         | 4.10E-24          |
| GRMZM2G168330 | 60S ribosomal protein L14                                          | 0.87                                                   | 1.82            | 6.55E-11          |
| GRMZM2G091383 | 40S ribosomal protein S24                                          | 0.91                                                   | 1.69            | 4.98E-03          |
| GRMZM2G100467 | 60S ribosomal protein L39                                          | 1.01                                                   | 1.4             | 3.22E-02          |
| GRMZM2G377797 | 40S ribosomal protein S16                                          | 1.19                                                   | 1.35            | 2.86E-02          |
| GRMZM2G142640 | 60S ribosomal protein L24                                          | 1.19                                                   | 2.07            | 2.20E-05          |
| GRMZM2G178968 | 60S ribosomal protein L7                                           | 1.4                                                    | 1.51            | 3.34E-03          |
| GRMZM2G116292 | 60S ribosomal protein L40                                          | 1.72                                                   | 2.47            | 2.91E-12          |
| GRMZM2G069651 | Heat shock protein Hsp90                                           | 2.58                                                   | 1.32            | 1.48E-02          |
| GRMZM2G156632 | Bowman-Birk type wound-induced proteinase inhibitor WIP1 Precursor | -5.81                                                  | 1.39            | 1.67E-02          |
| GRMZM2G474575 | Proteinase inhibitor I3, Kunitz legume                             | -3.18                                                  | 2.37            | 3.51E-02          |
| GRMZM2G005633 | Endochitinase B Precursor                                          | -2.59                                                  | 3.14            | 9.19E-42          |
| GRMZM2G304548 | Trypsin/factor XIA inhibitor Precursor                             | -1.84                                                  | 2.38            | 0.00E+00          |
| GRMZM2G146283 | Dof zinc finger protein PBF                                        | -1.54                                                  | 2.38            | 4.87E-08          |
| GRMZM2G448151 | 30S ribosomal protein S3, chloroplastic                            | 3.17                                                   | -1.22           | 4.69E-02          |

**Supplemental Table 6: NKD1, NKD2 and O2 Starchy Endosperm Co-Regulated Genes**

| GO term    | Ontology | Description                      | Number in co-DE | Number in Suggested Background | p-value  | FDR      |
|------------|----------|----------------------------------|-----------------|--------------------------------|----------|----------|
| GO:0045735 | F        | nutrient reservoir activity      | 18              | 100                            | 1.90E-32 | 4.20E-31 |
| GO:0004866 | F        | endopeptidase inhibitor activity | 6               | 82                             | 4.50E-09 | 3.30E-08 |
| GO:0030414 | F        | peptidase inhibitor activity     | 6               | 82                             | 4.50E-09 | 3.30E-08 |
| GO:0004857 | F        | enzyme inhibitor activity        | 6               | 180                            | 4.00E-07 | 2.20E-06 |
| GO:0030234 | F        | enzyme regulator activity        | 6               | 368                            | 2.20E-05 | 9.60E-05 |

**Supplemental Table 7: Enriched Gene Ontologies in NKD1, NKD2 and O2 Aleurone Co-Regulated Genes**

| GO term    | Ontology | Description                                  | Number in co-DE | Number in Suggested Background | p-value  | FDR      |
|------------|----------|----------------------------------------------|-----------------|--------------------------------|----------|----------|
| GO:0006412 | P        | translation                                  | 6               | 980                            | 5.30E-05 | 0.0024   |
| GO:0003735 | F        | structural constituent of ribosome           | 6               | 649                            | 5.30E-06 | 2.90E-05 |
| GO:0005198 | F        | structural molecule activity                 | 6               | 767                            | 1.40E-05 | 3.70E-05 |
| GO:0033279 | C        | ribosomal subunit                            | 7               | 301                            | 1.40E-09 | 1.40E-07 |
| GO:0005840 | C        | ribosome                                     | 8               | 772                            | 3.70E-08 | 1.40E-06 |
| GO:0044445 | C        | cytosolic part                               | 6               | 280                            | 4.20E-08 | 1.40E-06 |
| GO:0022626 | C        | cytosolic ribosome                           | 6               | 323                            | 9.50E-08 | 2.30E-06 |
| GO:0030529 | C        | ribonucleoprotein complex                    | 8               | 894                            | 1.10E-07 | 2.30E-06 |
| GO:0043228 | C        | non-membrane-bounded organelle               | 8               | 1579                           | 8.10E-06 | 0.00012  |
| GO:0043232 | C        | intracellular non-membrane-bounded organelle | 8               | 1579                           | 8.10E-06 | 0.00012  |
| GO:0032991 | C        | macromolecular complex                       | 8               | 2550                           | 0.00025  | 0.003    |
| GO:0005829 | C        | cytosol                                      | 6               | 1316                           | 0.00027  | 0.003    |

**Supplemental Table 8: Enriched Gene Ontologies in NKD1, NKD2 and O2 Starchy Endosperm Co-Regulated Genes**

| Gene ID                                                               | Forward primer          | Reverse primer          | Amplicon size (bp) |
|-----------------------------------------------------------------------|-------------------------|-------------------------|--------------------|
| Tubulin 1 ( <i>tub1</i> ), GRMZM2G164696                              | CAATACCCTGTTGCGCTTTG    | CAGTTCAGAAACATGAGCAAATA | 99                 |
| Proliferating cell Nuclear Antigen2 ( <i>pcna2</i> ), GRMZM2G108712   | CACATCTGGAGAAATTGGGAGTG | CCGGCTCCTGCATCTCTATAA   | 98                 |
| Cell Division Cycle2-like (CDC2-like), GRMZM2G068193                  | GACGAAGCTGTCTGCTCTTG    | CATCTCCCTTCTCACATCTTTG  | 146                |
| Granule Bound Starch Synthase ( <i>waxy1</i> ), GRMZM2G024993         | GCGTACGAGGAGATGGTGAG    | CAGCACGTTCTCCCAGTTCT    | 81                 |
| Endo Betachitinase 2, GRMZM2G005633                                   | GTGTAGGCGATCACTGTTTCA   | CACAGAATGGGTAGAAAGACCAC | 112                |
| Floury1, GRMZM2G094532                                                | CAGAAGCAGATGTATGACCGG   | ACAAGGCTCGATCAGTTATGG   | 106                |
| Actin-1, GRMZM2G047055                                                | AAGGCTGAGTACGACGAGT     | CTCTCGGCTTTGCATCTCTT    | 86                 |
| Nac Transcription factor ASN1/Nac36, GRMZM2G154182                    | CTAGCTAGTACATGCACCGTATC | CCAAACTCGAATCTGCTTCTTAC | 114                |
| Fatty acid Desaturase 2, GRMZM2G064701                                | TCGGCGAGTACTACCAGTT     | TGCTGTTGTACCAGAAGACG    | 123                |
| Phospholipid Transfer Protein homolog1 ( <i>plt1</i> ), GRMZM2G101958 | GCTCCAGGGTGAACCTGAA     | GTCGTGATCATGCGTAGGTAG   | 136                |
| Opaque2, GRMZM2G015534                                                | CCAGAAGTACAACGACGCTAAC  | CAGGGAGTCCTCTCCCATC     | 94                 |
| Faciata1-like, GRMZM2G010105                                          | GAAGAAATTAACCAGCCCAATCC | CACCACCTTATGGATACCATCTC | 126                |
| Prolamin-box Binding Factor1 ( <i>pbf1</i> ), GRMZM2G146283           | CAACGCTAGCTCTAGCAATATGA | TGGGAGCACATTAGGAATAAG   | 106                |
| Legumin1 ( <i>leg1</i> ), GRMZM2G174883                               | GACGAGAAACAACATCAACC    | GAAGATGTTCTCGGCGAAGT    | 102                |
| Ubiquitin Conjugating Enzyme (AL qRT), GRMZM2G132759                  | GCCATTGTTCCCTTGGATTTG   | TGGTAGGCCGACGATATACA    | 101                |
| <i>bet1</i> , GRMZM2G082785                                           | CTGTTGCCATTCTGTCTCACTG  | CACCGTCCTTGA AACCTTGGA  | 186                |
| <i>bet2</i> , GRMZM2G152655                                           | TGCACGCACAACAAGTGGGCAC  | AGCATGGCCCGTCGTATTACG   | 116                |
| <i>meg1</i> , GRMZM2G354335                                           | CTTTGCTGCTCATGCGCATGG   | GCATGCATGACTACACTGAGCC  | 202                |
| <i>mrp1</i> , GRMZM2G111306                                           | CCGTGGACAACATGGACATGATG | CTTCCATTTACCACGCCAAACAC | 191                |
| Ubiquitin Conjugating Enzyme (BETL qRT), GRMZM2G027378                | AGGAAGTTTGGTTTGTAGCG    | CTGTTGGATCCCATGACGG     | 168                |

Supplemental Table 9: Primer sequences used for qRT-PCR



| Primers     | Forward                                                 | Reverse                                                      |
|-------------|---------------------------------------------------------|--------------------------------------------------------------|
| GST-NKD1-ID | n1ID-BamH1:<br>GGATCCGCATCGAATTCATCGGCGGCGTTC<br>TTTG   | n1ID-Sal1:<br>aaaGTCGACCGTCGGCGGCAGGCGCGCGCTT<br>TC          |
| GST-NKD2-ID | n2ID-BamH1:<br>GGATCCGCGTCGAATTCACCGGCGGCGGC<br>G       | n2ID-Sal1:<br>aaaGTCGACGGTCGGCGGCAGCCGCGCGCTC                |
| GST-NKD1-FL | nkd1BamH1:<br>cttGGATCCGCATCGAATTCATCGGCGGCGT<br>TCTTTG | nkd1Sal1:<br>catGTCGACTGGCATCCTGCCTCCGTTGAAGGA<br>CGAGG      |
| GST-NKD2-FL | nkd2BamH1:<br>cttGGATCCGCGTCGAATTCACCGGCGGCGG<br>CG     | nkd2Sal1:<br>aaGTCGACTGGCATCCTGCCTCCATTGAAGGA<br>CG          |
| NKD1-ID-His | n1ID-BamH1:<br>GGATCCGCATCGAATTCATCGGCGGCGTTC<br>TTTG   | n1ID-HINDIII:<br>tttAAGCTTCGTCGGCGGCAGGCGCGCGCTTTC           |
| NKD2-ID-His | n2ID-BamH1:<br>GGATCCGCGTCGAATTCACCGGCGGCGGC<br>G       | n2ID-HINDIII:<br>tatAAGCTTGGTCGGCGGCAGCCGCGCGCTC             |
| NKD1-FL-His | nkd1BamH1:<br>cttGGATCCGCATCGAATTCATCGGCGGCGT<br>TCTTTG | nkd1BamH1 Rev:<br>catGGATCCTGGCATCCTGCCTCCGTTGAAGGA<br>CGAGG |
| NKD2-FL-His | nkd2BamH1:<br>cttGGATCCGCGTCGAATTCACCGGCGGCGG<br>CG     | nkd2BamH1 Rev:<br>aaGGATCCTGGCATCCTGCCTCCATTGAAGGA<br>CG     |

**Supplemental Table 10:** Primers used to generate NKD GST and 6x His tag expression constructs

| Primers | Forward                                                        | Reverse              |
|---------|----------------------------------------------------------------|----------------------|
| WT      | CCGGCCTTTGTCGTGGGCC, 5'Biotinylated (no Biotin for unlabeled)  | GGGCCACGACAAAGGCCGG  |
| M1      | CCGGCCTTGTCTGTGGGCC, 5'Biotinylated                            | GGGCCACGACAAGGCCGG   |
| M2      | CCGGCCTCTGTCTGTGGGCC, 5'Biotinylated (no Biotin for unlabeled) | GGGCCACGACAGAGGCCGG  |
| M3      | CCGGCCTTCGTCTGTGGGCC, 5'Biotinylated                           | GGGCCACGACGAAGGCCGG  |
| M4      | CCGGCCTTTTTCGTGGGCC, 5'Biotinylated                            | GGGCCACGAAAAAGGCCGG  |
| M7      | CCGGCCTTTGTCTTGGGCC, 5'Biotinylated                            | GGGCCAAGACAAAGGCCGG  |
| M8      | CCGGCCTTTGTCTGGGCC, 5'Biotinylated (no Biotin for unlabeled)   | GGGCCGCGACAAAGGCCGG  |
| MM3     | CCGGCCTTCGTCTGGGCC, 5'Biotinylated                             | GGGCCGCGACGAAGGCCGG  |
| M       | CCGGCCGTCGCCGTGGGCC, 5'Biotinylated                            | GGGCCACGGCGACGGGCCGG |
| MM      | CCGGCCGTCGCCGGGGGCC, 5'Biotinylated                            | GGGCCCGCGACGGGCCGG   |

**Supplemental Table 11.** Oligonucleotides used in electrophoretic mobility shift assays (EMSA)

| Primers                             | Forward                                            | Reverse                                               |
|-------------------------------------|----------------------------------------------------|-------------------------------------------------------|
| NKD1-ID C and N-terminal YFP halves | Sal1-nkd1:<br>ttGTCGACATGGCATCGAATTCATCGGC<br>GGCG | n1ID-BamH1:<br>tttGGATCCCCGTCGGCGGCAGGCCGCGC<br>CTTTC |
| NKD2-ID C and N-terminal YFP halves | Sal1-nkd2:<br>ttGTCGACATGATGGCGTCGAATTCACC<br>GGCG | n2ID-BamH1:<br>tatGGATCCCGTTCGGCGGCAGCCGCGC<br>CTC    |
| NKD1-FL C and N-terminal YFP halves | Sal1-nkd1:<br>ttGTCGACATGGCATCGAATTCATCGGC<br>GGCG | BamH1-nkd1:<br>aaGGATCCGTGGCATCCTGCCTCCGTTGA<br>AGG   |
| NKD2-FL C and N-terminal YFP halves | Sal1-nkd2:<br>ttGTCGACATGATGGCGTCGAATTCACC<br>GGCG | BamH1-nkd2:<br>aaGGATCCGTGGCATCCTGCCTCCATTGA<br>AGGAC |
| 35s-mCherry                         | Mch-kpn1:<br>tttGGTACCATGGTGAGCAAGGGCGAG<br>GAG    | Mch-BamH1:<br>tatGGATCCTTACTTGTACAGCTCGTCCAT<br>GCC   |

**Supplemental Table 12.** Primers and restriction sites used for cloning of constructs used in BiFC

| Primers                     | Forward                                                  | Reverse                                                    |
|-----------------------------|----------------------------------------------------------|------------------------------------------------------------|
| 35S <sub>pro</sub> :NKD1    | Sal1-nkd1:<br>ttGTCGACATGGCATCGAATTCATCGGCGG<br>CG       | BamH1-nkd2:<br>aaGGATCCGTGGCATCCTGCCTCCGTTG<br>AAGG        |
| 35S <sub>pro</sub> :NKD2    | Sal1-nkd2:<br>ttGTCGACATGATGGCGTCAATTCACCGG<br>CG        | BamH1-nkd1:<br>aaGGATCCGTGGCATCCTGCCTCCATTG<br>AAGGAC      |
| 35S <sub>pro</sub> :RLUC    | Rluc-NCO1:<br>aataCCATGGATGACTTCGAAAGTTTATGAT<br>CCAGAAC | Rluc-BamH1:<br>atttGGATCCTTATTGTTTCATTTTTGAGAAC<br>TCGCTCA |
| X1P-1 <sub>pro</sub> :LUC   | XIP1-Kpn1:<br>aaGGTACCGACCGACCTAGACTCCTCTAA<br>TC        | XIP1-Nhe1:<br>ttGCTAGCGTCTCGTTGGTTAATTGCTGC<br>TAC         |
| o2 <sub>pro</sub> :LUC      | O2-Sac1:<br>aaGAGCTCGCTCCAAAATATAGCAAGTCA<br>CAG         | O2-Nhe1:<br>ttGCTAGCCACATTTTGAAGGCCTCGAG                   |
| zp22.1 <sub>pro</sub> :LUC  | Azein22.3-Sac1:<br>aaGAGCTCACTTGAGGTTGCGACCAATTG<br>C    | Azein22.3-Nhe1:<br>ttGCTAGCGTTGTTAGGTTGTTGCTAATG<br>TGC    |
| nkd1 <sub>pro</sub> :LUC    | Nkd1-MIU1:<br>aataACGCGTGAAGCTCTATATTGATGGTTT<br>GTAAGCC | Nkd1-BGIIIR:<br>atttAGATCTGACTTCTCCCGATTTATCC<br>TGG       |
| vp1 <sub>pro</sub> :LUC     | Vp1-MIU1:<br>aataACGCGTGCTAGTGTTCTTTGAGCTCT<br>TGTGCTTG  | Vp1-Xho1:<br>atttCTCGAGCAGAGAGACACGACGACAA<br>AGGG         |
| vp1-mut <sub>pro</sub> :LUC | Vp1-MIU1:<br>aataACGCGTGCTAGTGTTCTTTGAGCTCT<br>TGTGCTTG  | Vp1-Xho1:<br>atttCTCGAGCAGAGAGACACGGCGACAA<br>AGGG         |
| JIP <sub>pro</sub> :LUC     | JIP-Sac1:<br>aaGAGCTCACTCAGCAAAGAACCGAATTC<br>CAG        | JIP-Nhe1:<br>ttGCTAGCATTACCTGCAACGATCGAGCA<br>AC           |
| MTF <sub>pro</sub> :LUC     | MFT-like-Kpn1:<br>aaGGTACCGGTTTCGAAACTGATCCTTAA<br>GCGG  | MFT-like-Nhe1:<br>ttGCTAGCGATCAACGCGACCTTGGGTA<br>GAG      |
| WRKY29 <sub>pro</sub> :LUC  | Wrky29-Mlu1:<br>aaACGCGTGGCCTTTACTCCTGTCTCCTA<br>G       | Wrky29-Xho1:<br>ttCTCGAGAGAGAGAGAGAGAGAAATTA<br>GCG        |

**Supplemental Table 13.** Primers and restriction sites used for cloning of transcription assay constructs.

| Construct                          | Description                                                                                                                                            | Experiments              |
|------------------------------------|--------------------------------------------------------------------------------------------------------------------------------------------------------|--------------------------|
| NKD1-ID-N-YFP                      | C-terminal YFP (N-terminus)                                                                                                                            | BiFC                     |
| NKD1-ID-C-YFP                      | C-terminal YFP (C-terminus)                                                                                                                            | BiFC                     |
| NKD2-ID-N-YFP                      | C-terminal YFP (N-terminus)                                                                                                                            | BiFC                     |
| NKD2-ID-C-YFP                      | C-terminal YFP (C-terminus)                                                                                                                            | BiFC                     |
| NKD1-FL-N-YFP                      | C-terminal YFP (N-terminus)                                                                                                                            | BiFC                     |
| NKD1-FL-C-YFP                      | C-terminal YFP (C-terminus)                                                                                                                            | BiFC                     |
| NKD2-FL-N-YFP                      | C-terminal YFP (N-terminus)                                                                                                                            | BiFC                     |
| NKD2-FL-C-YFP                      | C-terminal YFP (C-terminus)                                                                                                                            | BiFC                     |
| 35s-mCherry                        | Full length mCherry CDS                                                                                                                                | BiFC                     |
| GST-NKD1-ID                        | NKD1 ID CDS, N-terminal GST tag                                                                                                                        | Co-Pull Down, EMSA, SAAB |
| GST-NKD2-ID                        | NKD2 ID CDS, N-terminal GST tag                                                                                                                        | Co-Pull Down, EMSA, SAAB |
| GST-NKD1-FL                        | NKD1 CDS, N-terminal GST tag                                                                                                                           | Co-Pull Down, EMSA       |
| GST-NKD2-FL                        | NKD2 CDS, N-terminal GST tag                                                                                                                           | Co-Pull Down, EMSA       |
| NKD1-ID-His                        | NKD1 ID CDS, C-terminal 6x His tag                                                                                                                     | Co-Pull Down             |
| NKD2-ID-His                        | NKD2 ID CDS, C-terminal 6x His tag                                                                                                                     | Co-Pull Down             |
| NKD1-FL-His                        | NKD1 CDS, C-terminal 6x His tag                                                                                                                        | Co-Pull Down             |
| NKD2-FL-His                        | NKD2 CDS, C-terminal 6x His tag                                                                                                                        | Co-Pull Down             |
| X1P-1 <sub>pro</sub> :LUC          | X1P-1 proximal promoter region (-596bp from TSS to -4bp from ATG), Firefly Luciferase                                                                  | Transcription Assays     |
| <i>o2</i> <sub>pro</sub> :LUC      | <i>opaque2</i> proximal promoter region (-570bp from TSS to +432 from ATG), Firefly Luciferase                                                         | Transcription Assays     |
| <i>zp22.1</i> <sub>pro</sub> :LUC  | <i>zp22.1</i> proximal promoter region (-510bp from TSS to -1bp from ATG), Firefly Luciferase                                                          | Transcription Assays     |
| <i>nkd1</i> <sub>pro</sub> :LUC    | <i>nkd1</i> proximal promoter region (-966bp from TSS to -1bp from ATG), Firefly Luciferase                                                            | Transcription Assays     |
| <i>vp1</i> <sub>pro</sub> :LUC     | <i>vp1</i> proximal promoter region (-1592bp from TSS to +256bp from TSS), Firefly Luciferase                                                          | Transcription Assays     |
| <i>VP1-mut</i> <sub>pro</sub> :LUC | <i>vp1</i> proximal promoter region (-1592bp from TSS to +256bp from TSS) with point mutation in second NKD BCS TTGTCGT to TTGTCGC, Firefly Luciferase | Transcription Assays     |
| JIP <sub>pro</sub> :LUC            | JIP proximal promoter region (-600bp from TSS to ATG), Firefly Luciferase                                                                              | Transcription Assays     |
| MTF <sub>pro</sub> :LUC            | MTF proximal promoter region (-343bp from TSS to -8bp from ATG), Firefly Luciferase                                                                    | Transcription Assays     |
| <i>WRKY29</i> <sub>pro</sub> :LUC  | <i>WRKY29</i> proximal promoter region (-600bp from TSS to -19bp from ATG), Firefly Luciferase                                                         | Transcription Assays     |
| 35S <sub>pro</sub> :NKD1           | 2x 35S promoter-NKD1 CDS                                                                                                                               | Transcription Assays     |
| 35S <sub>pro</sub> :NKD2           | 2x 35S promoter-NKD2 CDS                                                                                                                               | Transcription Assays     |
| 35S <sub>pro</sub> :null           | 2x 35S promoter-MCS-TGA                                                                                                                                | Transcription Assays     |
| 35S <sub>pro</sub> :RLuc           | 2x 35S promoter-Renilla Luciferase CDS                                                                                                                 | Transcription Assays     |

Supplemental Table 14. Constructs cloned in this study.
